# Supplementary material
Source: PubMed Central journal article supplement (PMC4518026)
Supplement: NIHMS602939-supplement-01.pdf [file NIHMS602939-supplement-01.pdf]

## SUPPLEMENTARY INFORMATION

### Avidity-controlled hydrogels for injectable co-delivery of induced pluripotent stem cell-derived endothelial cells and growth factors

Widya Mulyasmita,<sup>1</sup> Lei Cai,<sup>2,3</sup> Ruby E. Dewi,<sup>2</sup> Arshi Jha,<sup>3,4</sup> Sabrina D. Ullmann,<sup>5</sup>  
Richard H. Luong,<sup>6</sup> Ngan F. Huang,<sup>3,4,7</sup> and Sarah C. Heilshorn<sup>1,2,3,\*</sup>

| Peptide | Schematic                                                                          | Amino Acid Sequence                                                                                                                                                                                                                                                                                                                                                                                                                                                   |
|---------|------------------------------------------------------------------------------------|-----------------------------------------------------------------------------------------------------------------------------------------------------------------------------------------------------------------------------------------------------------------------------------------------------------------------------------------------------------------------------------------------------------------------------------------------------------------------|
| C7      | 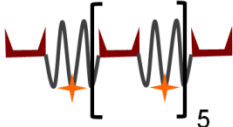  | MGSSHHHHHHSSGLVPRGSSSGHIDDDDKVDGT<br>[RLPAGWEQRM <sup>2</sup> DKGRPYFVDHVT <sup>2</sup> KSTTWED <sup>2</sup> PRPE] GTLDEL<br>[AGAGAGPEG] <sub>2</sub> RGDSAGPEG [AGAGAGPEG] <sub>2</sub> ELLDGT<br>( [RLPAGWEQRM <sup>2</sup> DKGRPYFVDHVT <sup>2</sup> KSTTWED <sup>2</sup> PRPE] GTLDEL [AG<br>AGAGPEG] <sub>2</sub> RGDSAGPEG [AGAGAGPEG] <sub>2</sub> ELLDGT ) <sub>5</sub><br>[RLPAGWEQRM <sup>2</sup> DKGRPYFVDHVT <sup>2</sup> KSTTWED <sup>2</sup> PRPE] GTLE |
| P1      |   | EYPPYPPPPYPSG                                                                                                                                                                                                                                                                                                                                                                                                                                                         |
| P2      |  | EYPPYPPPPYPSGGGGGEYPPYPPPPYPSG                                                                                                                                                                                                                                                                                                                                                                                                                                        |

**Fig. S1.** Amino acid sequences of C7, P1, and P2.
